# Supplementary material
Source: PubMed Central journal article supplement (PMC5014562)
Supplement: NIHMS772764-supplement-3.pdf [file NIHMS772764-supplement-3.pdf]

Species names acronyms used in this file: Scer – *Saccharomyces cerevisiae*, Hvol – *Haloferax volcanii*, Ecol – *Escherichia coli*, Bsub – *Bacillus subtilis*, Mcap – *Mycoplasma capricolum*, Llac – *Lactococcus lactis*.

**Table S 1 Sanity-check predictions results using only predicted enzymes data**

|      | <b>TP</b> | <b>FP</b> | <b>FN</b>  | <b>Precision</b> | <b>Recall</b> | <b>F-measure</b> |
|------|-----------|-----------|------------|------------------|---------------|------------------|
| Bsub | 131       | 283       | 19         | 0.316            | 0.873         | 0.465            |
| Ecol | 374       | 690       | 18         | 0.352            | 0.954         | 0.514            |
| Hvol | 379       | 503       | 59         | 0.430            | 0.865         | 0.574            |
| Mcap | 171       | 235       | 0          | 0.421            | 1.000         | 0.593            |
| Scer | 588       | 774       | 19         | 0.432            | 0.969         | 0.597            |
|      |           |           | <b>Avg</b> | <b>0.390</b>     | <b>0.932</b>  | <b>0.548</b>     |

**Table S 2 Sanity-check predictions results with phylogeny filter**

|      | <b>TP</b> | <b>FP</b> | <b>FN</b>  | <b>Precision</b> | <b>Recall</b> | <b>F-measure</b> |
|------|-----------|-----------|------------|------------------|---------------|------------------|
| Bsub | 131       | 187       | 19         | 0.412            | 0.873         | 0.560            |
| Ecol | 374       | 632       | 18         | 0.372            | 0.954         | 0.535            |
| Hvol | 379       | 289       | 59         | 0.567            | 0.865         | 0.685            |
| Mcap | 171       | 155       | 0          | 0.525            | 1.000         | 0.688            |
| Scer | 588       | 685       | 19         | 0.462            | 0.969         | 0.626            |
|      |           |           | <b>Avg</b> | <b>0.468</b>     | <b>0.932</b>  | <b>0.619</b>     |

**Table S 3 Cross-validation predictions results using only predicted enzymes data**

|      | <b>TP</b> | <b>FP</b> | <b>FN</b>  | <b>Precision</b> | <b>Recall</b> | <b>F-measure</b> |
|------|-----------|-----------|------------|------------------|---------------|------------------|
| Bsub | 128       | 355       | 22         | 0.265            | 0.853         | 0.404            |
| Ecol | 209       | 339       | 156        | 0.381            | 0.573         | 0.458            |
| Hvol | 354       | 488       | 84         | 0.420            | 0.808         | 0.553            |
| Llac | 148       | 423       | 19         | 0.259            | 0.886         | 0.401            |
| Mcap | 171       | 335       | 0          | 0.338            | 1.000         | 0.505            |
| Scer | 497       | 505       | 110        | 0.496            | 0.819         | 0.618            |
|      |           |           | <b>Avg</b> | <b>0.360</b>     | <b>0.823</b>  | <b>0.490</b>     |

**Table S 4 Cross-validation predictions results with phylogeny filter**

|      | <b>TP</b> | <b>FP</b> | <b>FN</b>  | <b>Precision</b> | <b>Recall</b> | <b>F-measure</b> |
|------|-----------|-----------|------------|------------------|---------------|------------------|
| Bsub | 128       | 214       | 22         | 0.374            | 0.853         | 0.520            |
| Ecol | 209       | 182       | 154        | 0.535            | 0.576         | 0.554            |
| Hvol | 354       | 274       | 84         | 0.564            | 0.808         | 0.664            |
| Llac | 145       | 276       | 22         | 0.344            | 0.868         | 0.493            |
| Mcap | 171       | 192       | 0          | 0.471            | 1.000         | 0.640            |
| Scer | 497       | 398       | 110        | 0.555            | 0.819         | 0.662            |
|      |           |           | <b>Avg</b> | <b>0.474</b>     | <b>0.821</b>  | <b>0.589</b>     |

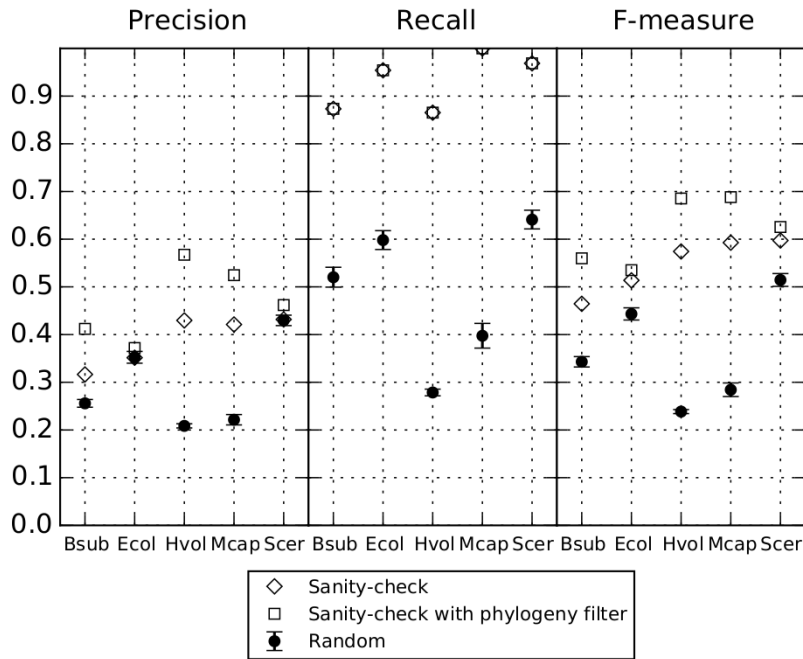

**Figure S 1** Comparison of the tRNAmodpred performance to results obtained by random assignment of modified residues to tRNA sequences from the target species. Scores for tRNAmodpred predictions done in the sanity-check setup are shown. Error bars for random probes depict scores variation between five random modifications sets.

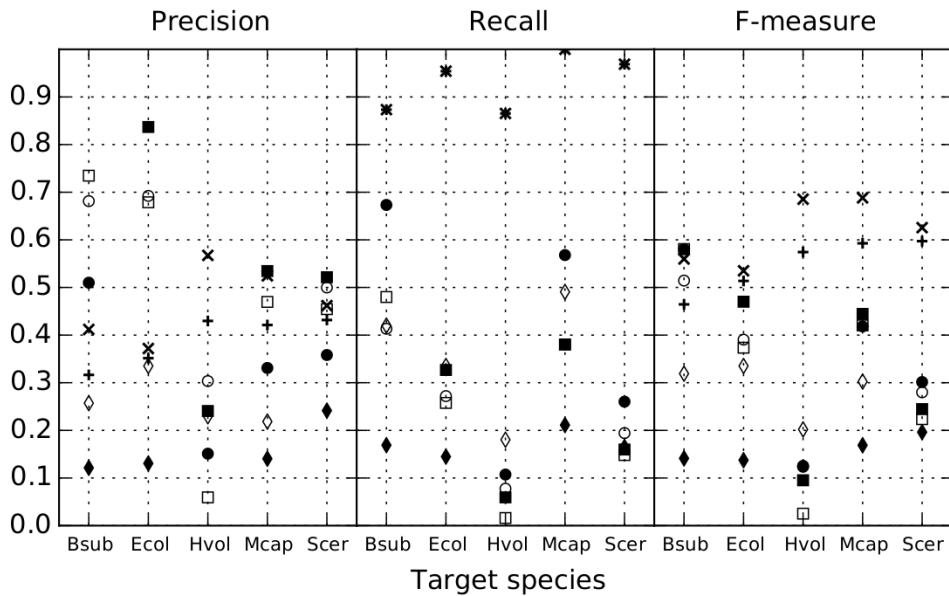

**Figure S 2** Comparison of precision, recall and F-measure calculated for tRNAmodpred predictions and results of mapping modifications from different species, for all tRNAs from the target species. Black and white points with different shapes represent different species used as source of modifications: ■ – *Bacillus subtilis*, ● – *Escherichia coli*, ◆ – *Haloflex volcanii*, □ – *Lactococcus lactis*, ○ – *Mycoplasma capricolum*, ◇ – *Saccharomyces cerevisiae*; “x” and “+” – predictions done by tRNAmodpred in the sanity-check setup with phylogeny filter or without it, respectively.

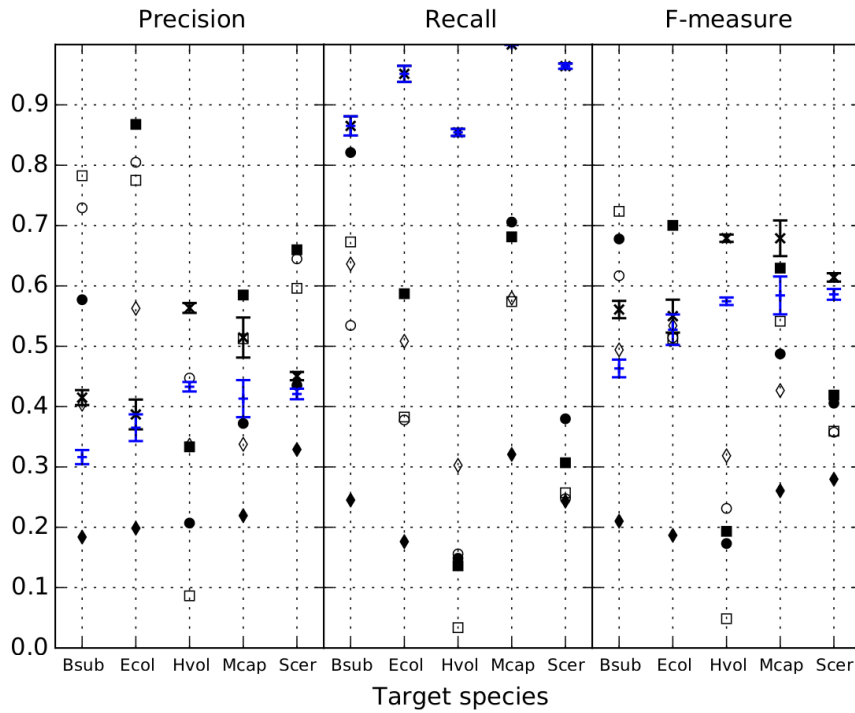

**Figure S 3** Comparison of precision, recall and F-measure calculated for tRNAmoldpred predictions and results of mapping modifications from different species, for those tRNAs from the target species for which an isoacceptor with the same anticodon sequence exists in the source species. Black and white points with different shapes represent different species used as source of modifications: ■ – *Bacillus subtilis*, ● – *Escherichia coli*, ◆ – *Haloflex volcanii*, □ – *Lactococcus lactis*, ○ – *Mycoplasma capricolum*, ◇ – *Saccharomyces cerevisiae*. Black “x” and blue “-” markers with error bars depict predictions done by tRNAmoldpred in the sanity-check setup with phylogeny filter or without it, respectively. Error bars represent variation of scores obtained for different sets of tRNAs (depending on the source species).

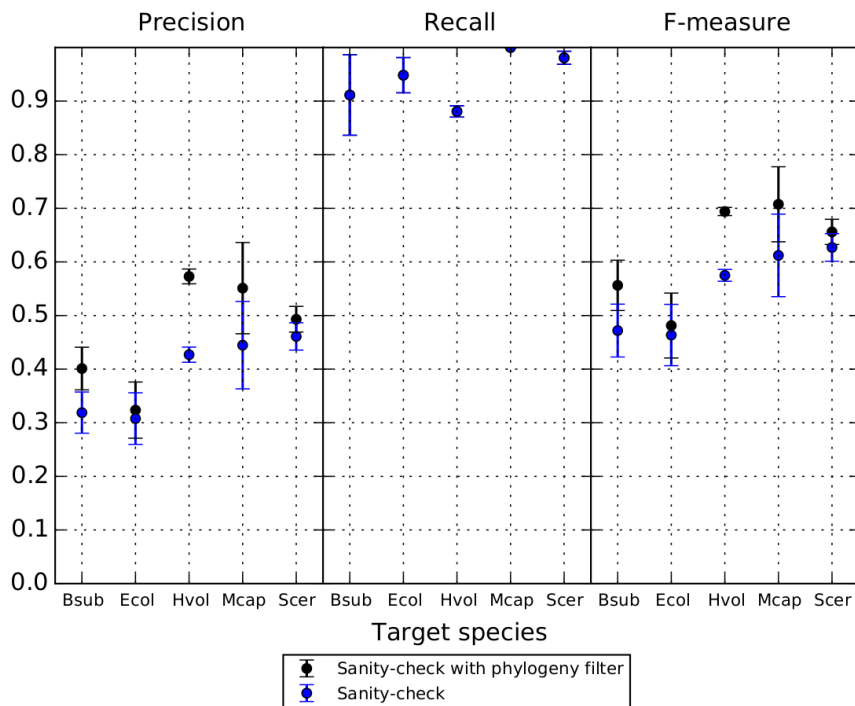

**Figure S 4** Precision, recall and F-measure calculated for tRNAmoldpred predictions for those tRNAs from the target species for which an isoacceptor with the same anticodon sequence does not exist in the source species. Error bars represent variation of scores obtained for different sets of tRNAs (depending on the source species).

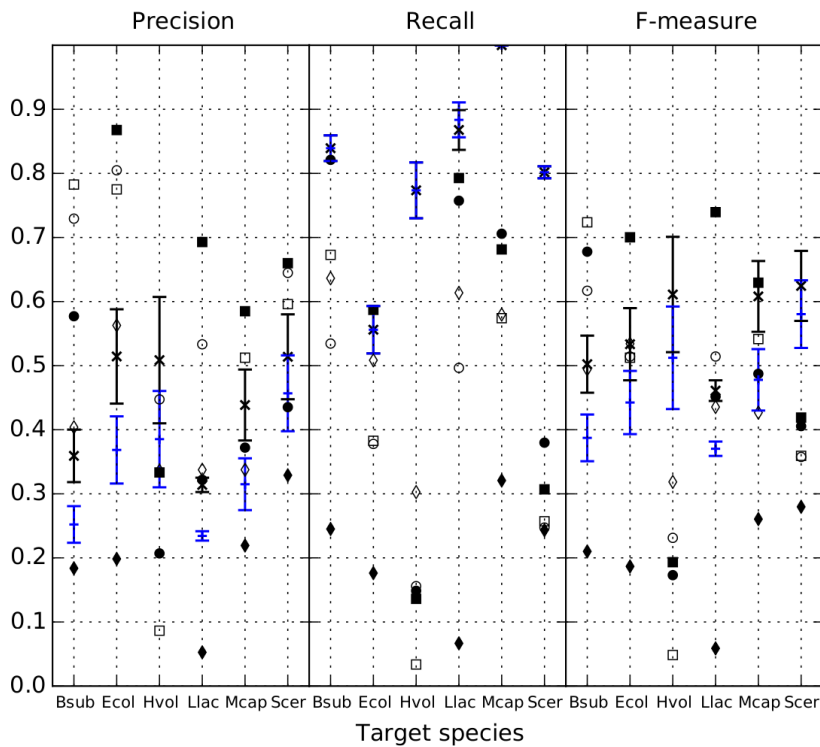

**Figure S 5** Comparison of precision, recall and F-measure calculated for tRNAmotpred predictions and results of mapping modifications from different species, for those tRNAs from the target species for which an isoacceptor with the same anticodon sequence exists in the source species. Black and white points with different shapes represent different species used as source of modifications: ■ – *Bacillus subtilis*, ● – *Escherichia coli*, ◆ – *Haloflex volcanii*, □ – *Lactococcus lactis*, ○ – *Mycoplasma capricolum*, ◇ – *Saccharomyces cerevisiae*. Black “x” and blue “-” markers with error bars depict predictions done by tRNAmotpred in cross validation setup with phylogeny filter or without it, respectively. Error bars represent variation of scores obtained for different sets of tRNAs (depending on the source species).

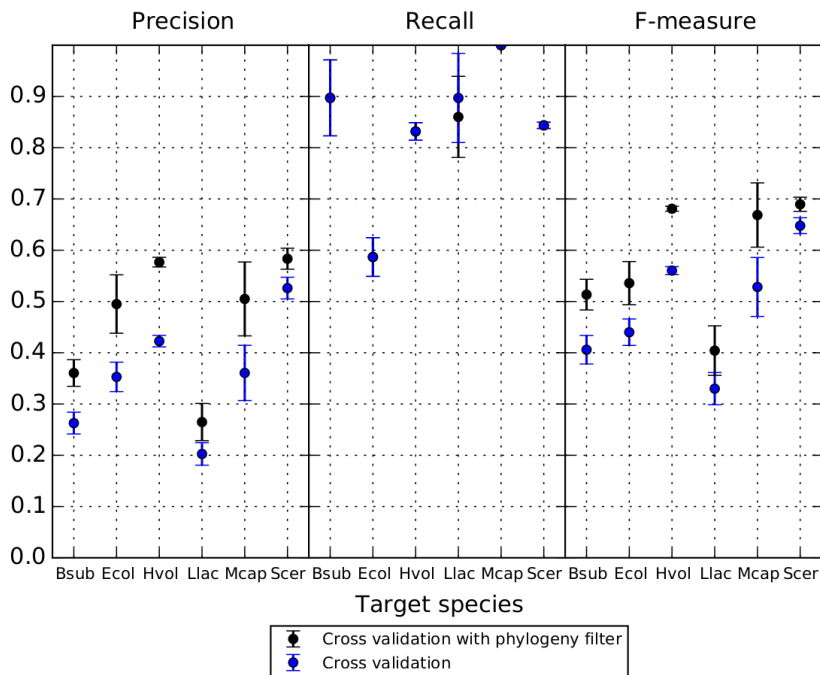

**Figure S 6** Precision, recall and F-measure calculated for tRNAmotpred predictions for those tRNAs from the target species for which an isoacceptor with the same anticodon sequence does not exist in the source species. Error bars represent variation of scores obtained for different sets of tRNAs (depending on the source species).

## Comparison of tRNAmodpred and tRNAmod

Results of checking whether combining tRNAmod and tRNAmodpred results improves the accuracy of predictions. tRNAmod was run with the common model. “Intersection” – from all U modifications reported by tRNAmodpred only those were kept, which were also predicted by tRNAmod. “Sum” – predictions of pseudouridine, dihydrouridine and 5-methyluridine which were present in results from tRNAmod but missing in the results from tRNAmodpred were added to the final results file.

**Table S 5** Influence of incorporating tRNAmod predictions on the results of sanity-check predictions results using only predicted enzymes data in tRNAmodpred

|            | Intersection     |               |              | Sum              |               |               |
|------------|------------------|---------------|--------------|------------------|---------------|---------------|
|            | Precision change | Recall change | F change     | Precision change | Recall change | F change      |
| Bsub       | 0.039            | 0.000         | 0.040        | 0.003            | 0.020         | 0.006         |
| Ecol       | 0.019            | -0.026        | 0.016        | -0.002           | 0.003         | -0.002        |
| Hvol       | 0.036            | -0.063        | 0.015        | -0.004           | 0.007         | -0.002        |
| Mcap       | 0.080            | -0.006        | 0.074        | -0.003           | 0.000         | -0.003        |
| Scer       | 0.042            | -0.082        | 0.020        | -0.005           | 0.002         | -0.004        |
| <b>Avg</b> | <b>0.043</b>     | <b>-0.035</b> | <b>0.033</b> | <b>-0.002</b>    | <b>0.006</b>  | <b>-0.001</b> |

**Table S 6** Influence of incorporating tRNAmod predictions on the results of sanity-check predictions results with phylogeny filter in tRNAmodpred

|            | Intersection     |               |              | Sum              |               |               |
|------------|------------------|---------------|--------------|------------------|---------------|---------------|
|            | Precision change | Recall change | F change     | Precision change | Recall change | F change      |
| Bsub       | 0.043            | 0.000         | 0.038        | -0.005           | 0.020         | 0.000         |
| Ecol       | 0.018            | -0.026        | 0.014        | -0.003           | 0.003         | -0.002        |
| Hvol       | 0.011            | -0.063        | -0.013       | -0.019           | 0.007         | -0.012        |
| Mcap       | 0.070            | -0.006        | 0.056        | -0.013           | 0.000         | -0.011        |
| Scer       | 0.043            | -0.082        | 0.018        | -0.005           | 0.002         | -0.005        |
| <b>Avg</b> | <b>0.037</b>     | <b>-0.035</b> | <b>0.023</b> | <b>-0.009</b>    | <b>0.006</b>  | <b>-0.006</b> |

**Table S 7** Influence of incorporating tRNAmod predictions on the results of cross validation predictions results using only predicted enzymes data in tRNAmodpred

|            | Intersection     |               |              | Sum              |               |              |
|------------|------------------|---------------|--------------|------------------|---------------|--------------|
|            | Precision change | Recall change | F change     | Precision change | Recall change | F change     |
| Bsub       | 0.027            | 0.000         | 0.031        | 0.003            | 0.020         | 0.006        |
| Ecol       | 0.033            | -0.005        | 0.021        | 0.024            | 0.121         | 0.054        |
| Hvol       | 0.036            | -0.067        | 0.012        | -0.004           | 0.007         | -0.002       |
| Llac       | 0.004            | -0.078        | -0.003       | -0.004           | 0.000         | -0.005       |
| Mcap       | 0.049            | -0.006        | 0.052        | -0.002           | 0.000         | -0.002       |
| Scer       | 0.039            | -0.056        | 0.011        | -0.001           | 0.036         | 0.009        |
| <b>Avg</b> | <b>0.032</b>     | <b>-0.035</b> | <b>0.021</b> | <b>0.003</b>     | <b>0.031</b>  | <b>0.010</b> |

**Table S 8** Influence of incorporating tRNAmod predictions on the results of cross validation predictions results with phylogeny filter in tRNAmodpred

|            | Intersection     |               |              | Sum              |               |              |
|------------|------------------|---------------|--------------|------------------|---------------|--------------|
|            | Precision change | Recall change | F change     | Precision change | Recall change | F change     |
| Bsub       | 0.036            | 0.000         | 0.034        | -0.003           | 0.020         | 0.001        |
| Ecol       | 0.026            | -0.009        | 0.010        | 0.007            | 0.117         | 0.054        |
| Hvol       | 0.011            | -0.067        | -0.017       | -0.020           | 0.007         | -0.012       |
| Llac       | 0.008            | -0.072        | -0.004       | -0.016           | 0.006         | -0.015       |
| Mcap       | 0.055            | -0.006        | 0.048        | -0.010           | 0.000         | -0.009       |
| Scer       | 0.041            | -0.056        | 0.008        | -0.004           | 0.036         | 0.009        |
| <b>Avg</b> | <b>0.030</b>     | <b>-0.035</b> | <b>0.013</b> | <b>-0.008</b>    | <b>0.031</b>  | <b>0.004</b> |

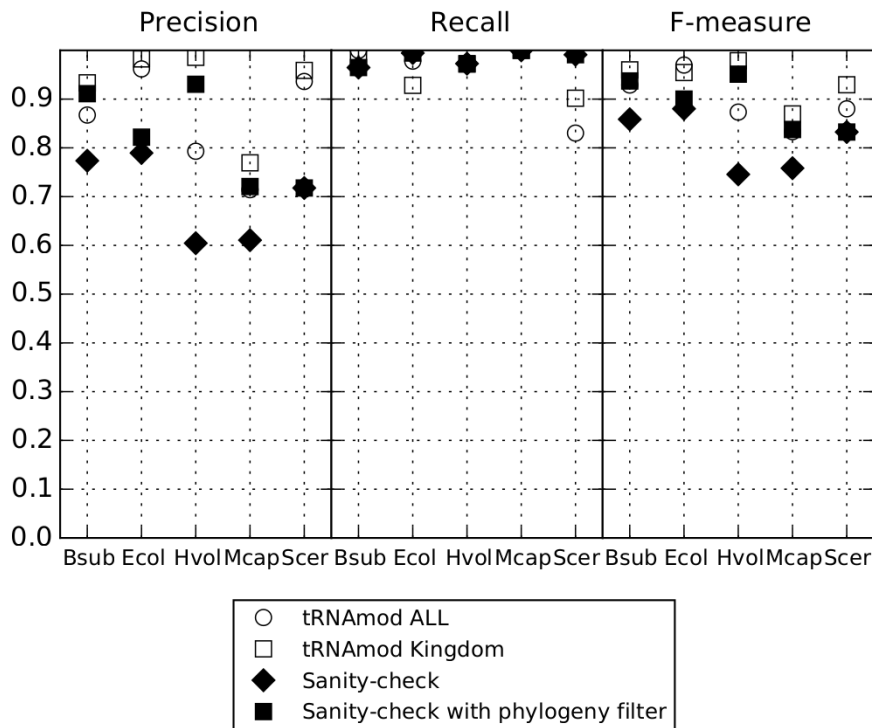

**Figure S 7** Precision, recall and F-measure calculated for pseudouridine, dihydrouridine and 5-methyluridine predictions done by tRNAmod and tRNAmodpred. Sanity-check with phylogeny filter, sanity-check – predictions by tRNAmodpred in the sanity-check setup with and without phylogeny filter, tRNAmod ALL, tRNAmod Kingdom – predictions done by tRNAmod with common and kingdom-specific models.

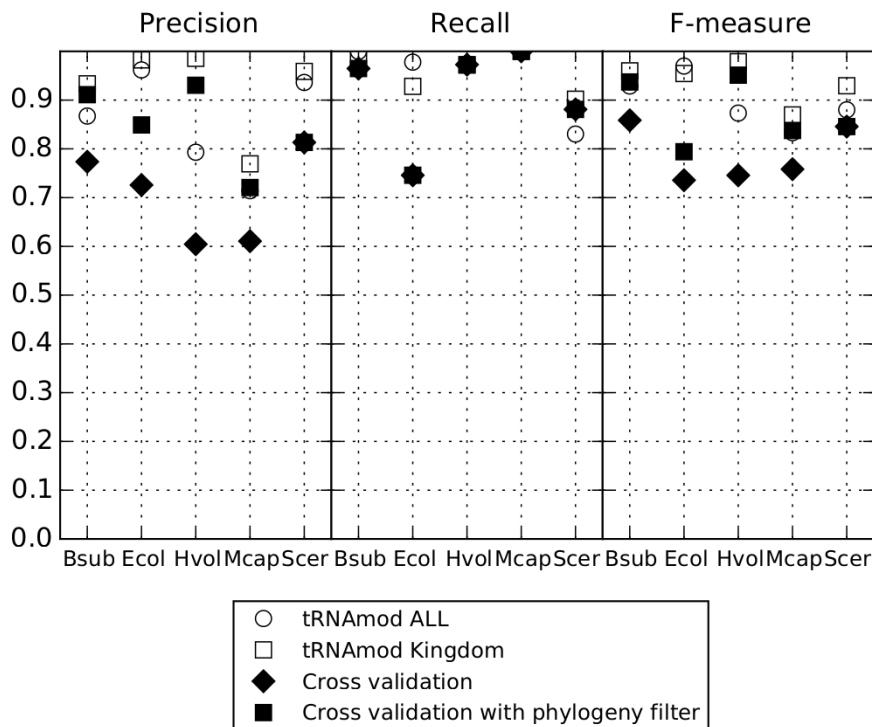

**Figure S 8** Precision, recall and F-measure calculated for pseudouridine, dihydrouridine and 5-methyluridine predictions done by tRNAmod and tRNAmodpred. Cross validation with phylogeny filter, cross validation – predictions by tRNAmodpred in the cross validation setup with and without phylogeny filter, tRNAmod ALL, tRNAmod Kingdom – predictions done by tRNAmod with common and kingdom-specific models.

**Table S 9** Detailed analysis of predictions for three chosen *L. lactis* tRNA sequences. Modifications expected based on *B. subtilis* and *E. coli* data represent all possible pathway intermediates of modifications which were experimentally identified.

| tRNA  | Anticodon | Position | Possible modifications expected based on experimental data | Possible modifications predicted by tRNAmotpred with phylogeny filter | Possible modifications expected based on <i>B. subtilis</i> data | Possible modifications expected based on <i>E. coli</i> data |
|-------|-----------|----------|------------------------------------------------------------|-----------------------------------------------------------------------|------------------------------------------------------------------|--------------------------------------------------------------|
| Ala   | UGC       | 8        | s4U                                                        | s4U                                                                   | None                                                             | None                                                         |
| Ala   | UGC       | 17       | D                                                          | D                                                                     | D                                                                | D                                                            |
| Ala   | UGC       | 34       | ho5U, mo5U                                                 | s2U, Um, s2Um, nm5U, nm5s2U, cmnm5U, cmnm5s2U, cmnm5Um                | ho5U, mo5U                                                       | ho5U, mo5U, cmo5U                                            |
| Ala   | UGC       | 37       | t6A                                                        | i6A, m2A, m6A, t6A, ct6A                                              | m6A                                                              | None                                                         |
| Ala   | UGC       | 46       | None                                                       | m7G                                                                   | m7G                                                              | m7G                                                          |
| Ala   | UGC       | 54       | m5U                                                        | m5U                                                                   | m5U                                                              | m5U                                                          |
| Leu 5 | UAA       | 8        | None                                                       | s4U                                                                   | data unavailable                                                 | s4U                                                          |
| Leu 5 | UAA       | 17       | D                                                          | D                                                                     | data unavailable                                                 | D                                                            |
| Leu 5 | UAA       | 18       | None                                                       | None                                                                  | data unavailable                                                 | Gm                                                           |
| Leu 5 | UAA       | 22       | None                                                       | m1A                                                                   | data unavailable                                                 | None                                                         |
| Leu 5 | UAA       | 34       | s2U, cmnm5U, cmnm5s2U                                      | s2U, Um, s2Um, nm5U, nm5s2U, cmnm5U, cmnm5s2U, cmnm5Um                | data unavailable                                                 | Um, cmnm5U, cmnm5Um                                          |
| Leu 5 | UAA       | 37       | i6A                                                        | i6A, m2A, m6A, t6A, ct6A                                              | data unavailable                                                 | i6A, ms2i6A                                                  |
| Leu 5 | UAA       | 46       | None                                                       | m7G                                                                   | data unavailable                                                 | None                                                         |
| Leu 5 | UAA       | 54       | m5U                                                        | m5U                                                                   | data unavailable                                                 | m5U                                                          |
| Phe   | GAA       | 8        | s4U                                                        | s4U                                                                   | None                                                             | s4U                                                          |
| Phe   | GAA       | 16       | None                                                       | D                                                                     | None                                                             | D                                                            |
| Phe   | GAA       | 17       | D                                                          | D                                                                     | D                                                                | None                                                         |
| Phe   | GAA       | 20       | D                                                          | D                                                                     | D                                                                | D                                                            |
| Phe   | GAA       | 34       | None                                                       | None                                                                  | Gm                                                               | None                                                         |
| Phe   | GAA       | 37       | m1G                                                        | m1G                                                                   | None                                                             | None                                                         |
| Phe   | GAA       | 46       | m7G                                                        | m7G                                                                   | m7G                                                              | m7G                                                          |
| Phe   | GAA       | 47       | None                                                       | None                                                                  | None                                                             | acp3U                                                        |
| Phe   | GAA       | 54       | m5U                                                        | m5U                                                                   | m5U                                                              | m5U                                                          |
| Arg   | ACG       | 8        | None                                                       | s4U                                                                   | None                                                             | s4U                                                          |
| Arg   | ACG       | 17       | D                                                          | D                                                                     | None                                                             | D                                                            |
| Arg   | ACG       | 20a      | D                                                          | D                                                                     | D                                                                | D                                                            |
| Arg   | ACG       | 32       | None                                                       | None                                                                  | None                                                             | s2C                                                          |
| Arg   | ACG       | 34       | I                                                          | I                                                                     | I                                                                | I                                                            |
| Arg   | ACG       | 37       | m2A                                                        | i6A, m2A, m6A, t6A, ct6A                                              | None                                                             | m2A                                                          |
| Arg   | ACG       | 46       | m7G                                                        | m7G                                                                   | m7G                                                              | m7G                                                          |
| Arg   | ACG       | 47       | None                                                       | None                                                                  | None                                                             | acp3U                                                        |
| Arg   | ACG       | 54       | m5U                                                        | m5U                                                                   | m5U                                                              | m5U                                                          |

|       |     |    |                       |                                                        |                       |                                                                 |
|-------|-----|----|-----------------------|--------------------------------------------------------|-----------------------|-----------------------------------------------------------------|
| Lys 2 | UUU | 8  | None                  | s4U                                                    | None                  | None                                                            |
| Lys 2 | UUU | 16 | None                  | D                                                      | None                  | D                                                               |
| Lys 2 | UUU | 17 | D                     | D                                                      | D                     | D                                                               |
| Lys 2 | UUU | 20 | D                     | D                                                      | D                     | D                                                               |
| Lys 2 | UUU | 34 | s2U, cmnm5U, cmnm5s2U | s2U, Um, s2Um, nm5U, nm5s2U, cmnm5U, cmnm5s2U, cmnm5Um | s2U, cmnm5U, cmnm5s2U | s2U, Um, s2Um, nm5U, nm5s2U, cmnm5U, cmnm5s2U, cmnm5Um, mnm5s2U |
| Lys 2 | UUU | 37 | t6A                   | i6A, m2A, m6A, t6A, ct6A                               | t6A, ms2t6A           | t6A                                                             |
| Lys 2 | UUU | 46 | m7G                   | m7G                                                    | m7G                   | m7G                                                             |
| Lys 2 | UUU | 47 | None                  | None                                                   | None                  | acp3U                                                           |
| Lys 2 | UUU | 54 | m5U                   | m5U                                                    | m5U                   | m5U                                                             |



## Prediction of modifications in *S. cerevisiae* mitochondrial tRNAs

Predictions of modifications for yeast mitochondrial tRNAs were performed as follows:

1. A set of sequences of proteins reported to be present in mitochondria was collected based on the Supplementary Table 2 provided in: Wiederhold E, Veenhoff LM, Poolman B, Slotboom DJ. *Proteomics of Saccharomyces cerevisiae Organelles*. Mol Cell Proteomics. 2010 Mar;9(3):431-45.
2. tRNAmospred was used to predict modifications in 17 *S. cerevisiae* mitochondrial tRNAs which have been sequenced and are available in the MODOMICS database. Predictions without any phylogenetic filter and with phylogenetic filter set to mitochondria were performed.

**Table S 10** Scores obtained for the prediction of modifications in *S. cerevisiae* mitochondrial tRNAs.

| Phylogenetic filter | TP | FP  | FN | Precision | Recall | F-measure |
|---------------------|----|-----|----|-----------|--------|-----------|
| None                | 61 | 108 | 61 | 0.36      | 0.5    | 0.42      |
| Mitochondria        | 61 | 65  | 61 | 0.48      | 0.5    | 0.49      |

## Example score calculations for hypothetical prediction of $\text{mnm}^5\text{s}^2\text{U}$ modification

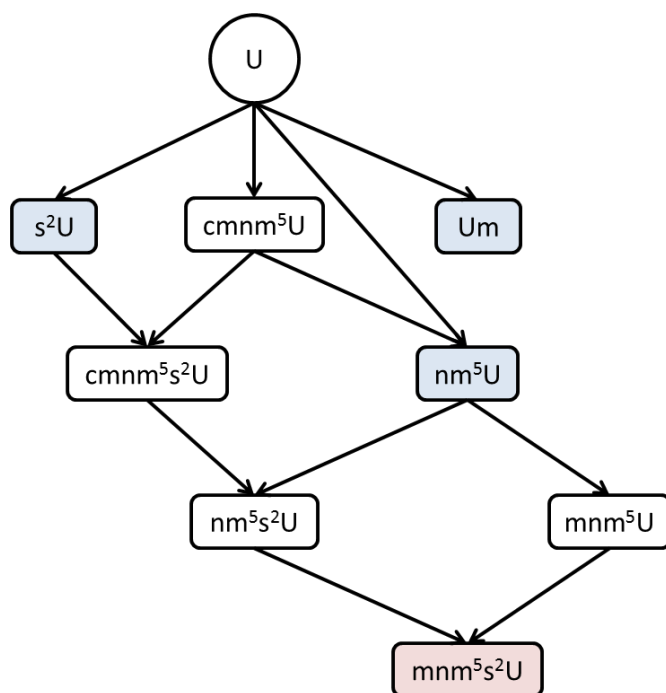

**Figure S 9** Alternative pathways leading to the  $\text{mnm}^5\text{s}^2\text{U}$  modification; blue - modifications predicted by tRNAmospred, red – modification supported by experimental data.

If experimental data supported the presence of  $\text{mnm}^5\text{s}^2\text{U}$  in the position of interest but tRNAmospred predicted Um,  $\text{s}^2\text{U}$  and  $\text{nm}^5\text{U}$  for this position, then the following scores values would be calculated:

$tp = 2$  (because both  $\text{s}^2\text{U}$  and  $\text{nm}^5\text{U}$  belong to alternative pathways leading to experimentally supported  $\text{mnm}^5\text{s}^2\text{U}$ )

$fp = 1$  (because Um does not belong to any alternative pathway leading to  $\text{mnm}^5\text{s}^2\text{U}$ )

$fn = 2$  (because the minimal number of modifications missing in the pathway leading to  $\text{mnm}^5\text{s}^2\text{U}$  equals 2:  $\text{mnm}^5\text{U}$  and  $\text{mnm}^5\text{s}^2\text{U}$  itself)
